# Supplementary material
Source: publisher figshare collection journal article supplement (https://sage.figshare.com/ndownloader/files/23017589)
Supplement: Supplementary file 1 [file 23017589]

## Appendix

### Communication-Promoting Behaviors Checklist for Caregivers

Name:

Completed by:

Date:

Rating scale for communication-promoting behaviors

Rarely observed                      Often observed  
1-----2-----3-----4-----5-----6-----7

| Behavior                                                                                                       | Rating | Comments |
|----------------------------------------------------------------------------------------------------------------|--------|----------|
| <b>I. Sensitivity to child</b>                                                                                 |        |          |
| 1. Handles child in a positive manner                                                                          |        |          |
| 2. Paces play and talk in accordance with child's tempo                                                        |        |          |
| 3. Follows child's interests much time                                                                         |        |          |
| 4. Provides appropriate stimulation, activities and play for the child's age and stage                         |        |          |
| 5. Encourages and facilitates child's play with objects and materials                                          |        |          |
| <b>II. Conversational behaviors</b>                                                                            |        |          |
| <b>A. <i>In responding to the child</i></b>                                                                    |        |          |
| 6. Recognizes child's communicative attempts                                                                   |        |          |
| 7. Responds to child's communicative attempts                                                                  |        |          |
| 8. Responds with a response which includes a question or comment requiring a further response from the child   |        |          |
| 9. Imitates child's productions                                                                                |        |          |
| 10. Provides child with the words appropriate to what he/she apparently wants to express                       |        |          |
| 11. Expands child's productions semantically and/or grammatically                                              |        |          |
| <b>B. <i>In establishing shared attention</i></b>                                                              |        |          |
| 12. Attempts to engage child                                                                                   |        |          |
| 13. Talks about what the child is experiencing, looking at, doing                                              |        |          |
| 14. Uses voices (first) to attract child's attention to objects, events, self                                  |        |          |
| 15. Uses body movement, gestures, touch appropriately in attracting child's attention to objects, events, self |        |          |
| <b>III. In general</b>                                                                                         |        |          |
| 16. Uses phrases and sentences of appropriate length and complexity                                            |        |          |
| 17. Pauses expectantly after speaking to encourage child to respond                                            |        |          |
| 18. Speaks to child with appropriate rate, intensity and pitch                                                 |        |          |
| 19. Uses interesting, animated voice                                                                           |        |          |
| 20. Uses normal, unexaggerated mouth movements                                                                 |        |          |
| 21. Uses audition-maximizing techniques                                                                        |        |          |
| 22. Uses appropriate gestures                                                                                  |        |          |
